# Supplementary material
Source: Springer Nature journal article supplement (http://www.springermedizin.de/resource/supplementary/12882_2007_93_MOESM1_ESM.pdf/9454986)

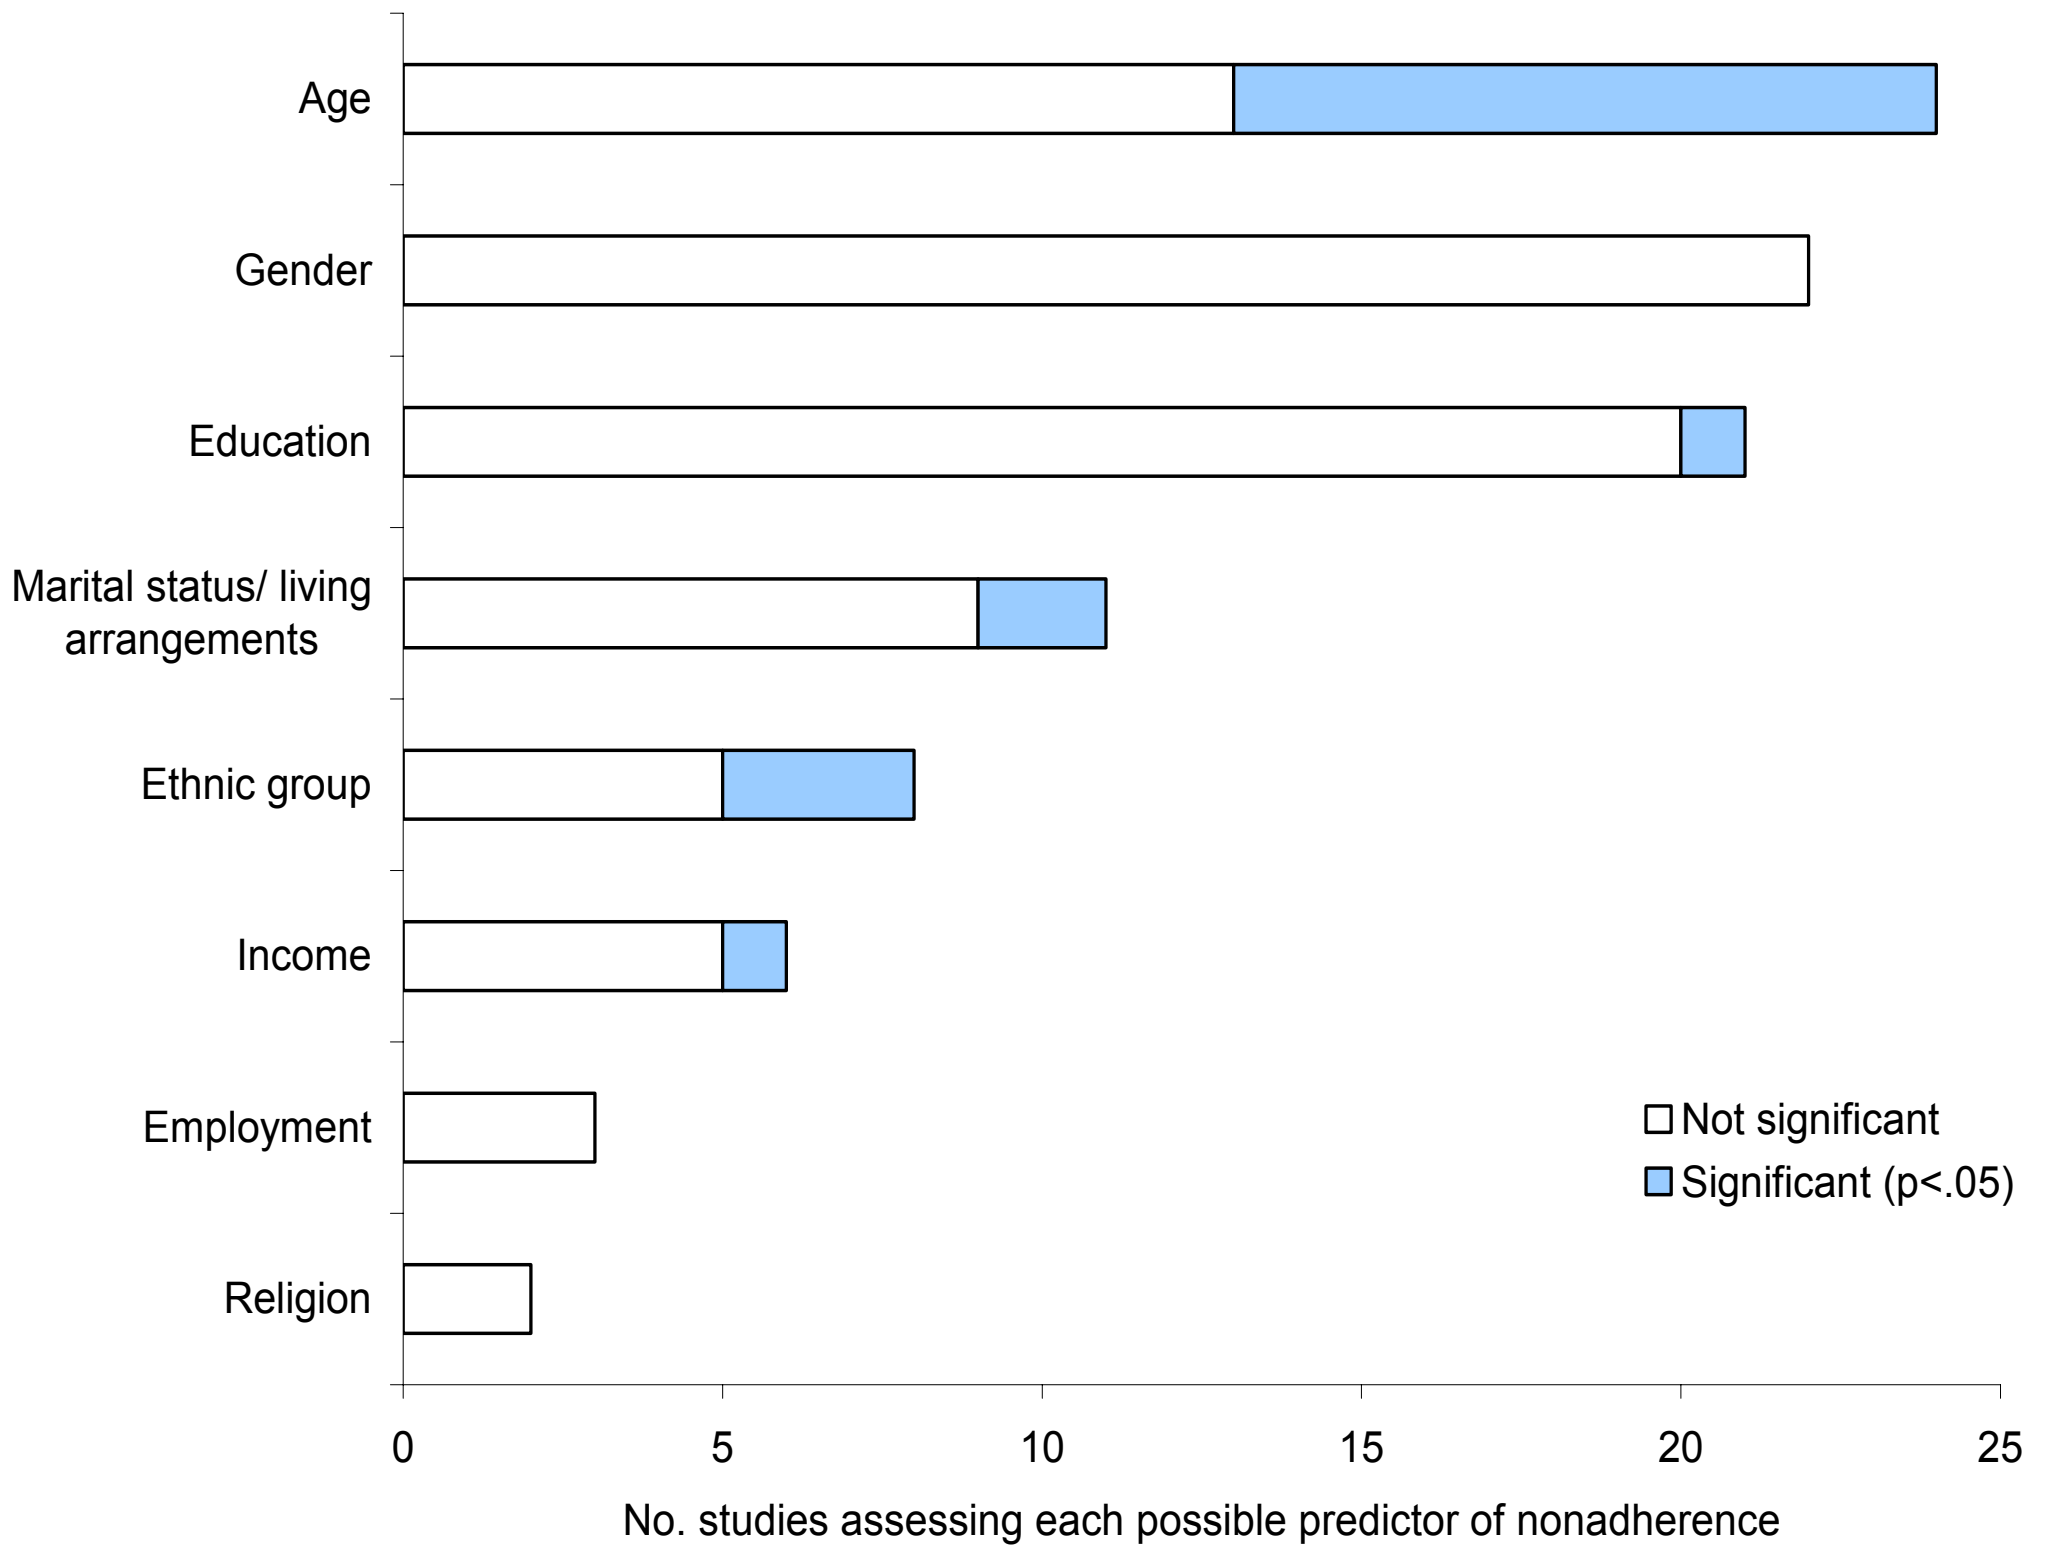

Supplement: MOESM1 [file 9454986]
